1 Revisiting the impact of *Schistosoma mansoni* regulating  
2 mechanisms on transmission dynamics using SchiSTOP, a novel  
3 modelling framework

4

5 Veronica Malizia<sup>1,2\*</sup>, Sake J. de Vlas<sup>1</sup>, Kit C.B. Roes<sup>2</sup>, Federica Giardina<sup>2\*</sup>

6

7

8 <sup>1</sup> Department of Public Health, Erasmus MC, University Medical Center Rotterdam, Rotterdam, The  
9 Netherlands

10 <sup>2</sup> Radboud University Medical Center, Department IQ Health, Biostatistics Research Group,  
11 Nijmegen, The Netherlands

12

13 \*Corresponding author

14 E-mail: [Veronica.Malizia@radboudumc.nl](mailto:Veronica.Malizia@radboudumc.nl), [Federica.Giardina@radboudumc.nl](mailto:Federica.Giardina@radboudumc.nl)

15

16

## 17 **Abstract**

## 18 **Background**

19 The transmission cycle of *Schistosoma* is remarkably complex, including sexual reproduction in the  
20 human hosts and asexual reproduction in the intermediate host (freshwater snails). Patterns of rapid  
21 recrudescence after treatment and stable low transmission are often observed, hampering the  
22 achievement of control targets. Current mathematical models commonly assume regulation of  
23 transmission to occur at worm level through density-dependent egg production. However, conclusive  
24 evidence on this regulating mechanism is weak, especially for *S. mansoni*. In this study, we explore  
25 the interplay of different regulating mechanisms and their ability to explain observed patterns in *S.*  
26 *mansoni* epidemiology.

## 27 **Methodology/Principal findings**

28 We developed SchiSTOP: a hybrid stochastic agent-based and deterministic modelling framework to  
29 reproduce *S. mansoni* transmission in an age-structured human population. We implemented different  
30 models with regulating mechanisms at: i) worm-level (density-dependent egg production), ii) human-  
31 level (anti-reinfection immunity), and iii) snail-level (density-dependent snail dynamics). Additionally,  
32 we considered two functional choices for the age-specific exposure to water bodies. We compared the  
33 ability of each model to reproduce observed epidemiological patterns pre- and post-control, and we  
34 compared the successful models in their predictions of the impact of school-based and community-  
35 wide treatment.

36 Simulations confirmed that assuming at least one regulating mechanism is required to reproduce a  
37 stable endemic equilibrium. Snail-level regulation was necessary to explain stable low transmission.  
38 Only models combining snail- and human-level regulation with an age-exposure function informed  
39 with water contact data were successful in reproducing observed patterns. However, the predicted  
40 probability of reaching the control targets varied across successful models.

## 41 **Conclusions/Significance**

42 The choice of regulating mechanisms in schistosomiasis dynamics largely determines the model-  
43 predicted feasibility to reach control targets. Overall, the models that successfully explained observed  
44 patterns for *S. mansoni* suggest that reaching the control targets may be more challenging than  
45 currently thought. Conclusions highlight the importance of regulating mechanisms to be included in  
46 transmission models used for policy.

47

## 48 **Author Summary**

49 Schistosomiasis is a neglected tropical disease estimated to affect 200 million people worldwide and  
50 causes severe morbidity in endemic countries. The transmission of *Schistosoma* is complicated by the  
51 multiplication of parasites within freshwater snails that act as intermediate hosts. Rapid rebound of  
52 infection after mass treatment is commonly observed, as well as stable low transmission. Several  
53 mathematical models are currently employed to inform policy decisions, building on the predominant  
54 assumption of worm-level regulation through density-dependent egg production. We explored the  
55 interplay of different regulating mechanisms assumed at worm-, human-, and snail-level and their  
56 ability to explain observed epidemiological patterns. To this end, we developed SchiSTOP, a new  
57 modelling framework for *S. mansoni* transmission dynamics and considered 162 model variants.  
58 Results show that snail-level regulation is required to explain stable low transmission, while the  
59 combination of snail- and human-level regulation is necessary to reproduce a rapid rebound after  
60 control. We further show that the choice of regulating assumptions heavily influences conclusions  
61 about the feasibility to reach control targets. In particular, the models that successfully explained  
62 observed patterns for *S. mansoni* suggest that achieving control targets solely through mass drug  
63 administration may be more challenging than currently thought.

## 64 **Introduction**

65 Schistosomiasis is a neglected tropical disease (NTD) caused by parasitic *Schistosoma* parasitic  
66 flatworm species. Widespread in tropical and sub-tropical regions, schistosomiasis is endemic in 78  
67 countries with an estimated 236 million people requiring treatment in 2019 [1]. Responsible for severe  
68 morbidity such as complications due to chronic infections of the urinary tract or the intestine,  
69 schistosomiasis is considered the deadliest among NTDs [2]. The intestinal form of schistosomiasis is  
70 caused by *S. mansoni*, and urogenital schistosomiasis is caused by *S. haematobium* [3]. The  
71 transmission dynamics of *Schistosoma* between the human host and the water environment are  
72 peculiar and remarkably complex, due to two reproduction phases. The first-stage larvae (miracidia)  
73 multiply asexually in freshwater snails, acting as intermediate host, and develop in a second larval  
74 stage (cercariae) able to infect humans, where they mature, pair, and sexually reproduce. Monogamous  
75 in their nature, adult pairs of *Schistosoma* release eggs within the human host. Individuals with  
76 schistosomiasis contaminate freshwater sources with their excreta containing parasite eggs, which  
77 result in miracidia after hatching. The World Health Organization (WHO) 2030 Roadmap for NTDs  
78 delineates two control targets for schistosomiasis: elimination as a public health problem (EPHP) in all  
79 endemic countries and interruption of transmission (IOT) in 32% of the endemic countries [1]. EPHP  
80 is defined by WHO as achieving a prevalence of heavy intensity infections in school-aged children  
81 (SAC) below 1%. Infections are classified as heavy intensity if more than 400 eggs per gram of faeces  
82 (epg) are detected for *S. mansoni*, and >50 eggs per 10 mL urine for *S. haematobium*. IOT is defined  
83 by WHO as having no new autochthonous human cases in a defined geographical area.

84 Mass drug administration (MDA) to SAC with the anthelmintic drug praziquantel is the primary  
85 measure for the control of schistosomiasis. Praziquantel reduces the overall prevalence of infection in  
86 the population by killing adult worms within the human hosts [4]. However, the prevalence of  
87 infection typically rebounds to pre-control levels quickly after stopping MDA [1, 5, 6], but we  
88 currently lack a clear understanding of rebound pathways. Moreover, maintained transmission at low  
89 endemic levels (< 10% prevalence in SAC) has been observed [7-9], hampering the achievement of

90 interruption of transmission. The WHO has recently provided a recommendation for additional control  
91 measures to prevent rebound of infection, including focal snail control and behavioural change  
92 interventions (through education and improvement of hygiene and sanitation standards) in endemic  
93 countries [10].

94 Mathematical models have historically been employed to reproduce and elucidate the transmission  
95 dynamics of *Schistosoma* species [11]. Deterministic models have been developed to describe the  
96 mean worm burden within humans over time [12-15], while more sophisticated agent-based models  
97 (ABMs) have included individual heterogeneities in transmission, exposure to infection and adherence  
98 to treatment [16-21].

99 Mathematical models for schistosomiasis require assumptions on mechanisms regulating transmission  
100 in order to reproduce a stable endemic equilibrium. In the absence of regulating mechanisms, the  
101 number of cercariae in the environment and the burden of worms in humans will grow unbounded,  
102 leading to an endemicity setting where the entire population is heavily infected. The assumption of  
103 density-dependence in egg production, according to which production of eggs by female worms  
104 diminishes with increasing adult worm burdens (density-dependent fecundity), has been largely  
105 accepted and employed with the rationale of overcrowding effects within the human host, in analogy  
106 with other intestinal parasites [13, 22]. However, scientific evidence for this assumption for  
107 schistosomiasis has been based on historic human autopsy data [23, 24], and the applicability of such  
108 data was disputed [25]. The availability of new molecular data analysed via sibship reconstruction [26]  
109 has provided some recent evidence of density-dependence in egg production for *S. haematobium*  
110 species, but the results were not conclusive for *S. mansoni*, where this question remains unresolved.

111 Regulating mechanisms at the level of the human host or at the level of the snail host, and the interplay  
112 of such mechanisms, have not been sufficiently included in current models used for policy. At the  
113 human level, host-acquired immunity has been suggested in antibodies detection studies [27-29] and  
114 was included in some deterministic age-structured models [30-32]. However, a clear and conclusive  
115 understanding of the processes of the development of acquired immunity (e.g. triggers, rate) and the  
116 extent to which it may restrain transmission is missing, especially for *S. mansoni* [33]. Modelling

117 studies have shed some light on the role of the intermediate hosts in the transmission dynamics of  
118 schistosomiasis [34-36]. On the one hand, snails can itself regulate the transmission dynamics with an  
119 amplifying effect due to the multiplication of miracidia within the snail host. On the other hand, the snails  
120 constitute a potential restraint of transmission because of their competition for resources [36], the  
121 depletion of susceptible snails, and the increased snail mortality upon infection [37, 38]. Overall,  
122 insufficient attention has been given to describe both host-induced immunity and dynamics of the  
123 intermediate host in mathematical models employed for guiding policy decisions. There is a need to  
124 further understand the extent to which different regulating mechanisms occurring at worm-, human-,  
125 and snail-level can explain observed epidemiological patterns and how these affect the estimated  
126 impact of control interventions.

127 The aim of this study is to assess how well different modelling assumptions on the regulating  
128 mechanisms of schistosomiasis transmission dynamics can reproduce observed endemicity pre-control  
129 settings (low, moderate, high) and explain epidemiological patterns observed before, during and after  
130 MDA with praziquantel. We also investigate how such assumptions on regulating mechanisms and  
131 their interplay affect the feasibility to reach the control targets set by the WHO, in particular EPHP  
132 and IOT following two MDA strategies: targeting SAC or the whole community. In this work, we  
133 focused on *S. mansoni* species and developed SchiSTOP: a hybrid modelling framework for the  
134 transmission of *S. mansoni* between humans and snails that combines an agent-based model (ABM)  
135 describing the human and worm populations, and a deterministic compartmental model for the snail  
136 dynamics. We consider the combinations of three assumptions on the regulation occurring at worm  
137 level (density-dependence in egg production), human-level (anti-reinfection immunity), and snail-level  
138 (density-dependence in snails' population growth).

## 139 **Methods**

### 140 **Model structure**

141 We developed SchiSTOP, an agent-based stochastic modelling framework for the transmission  
142 dynamics of schistosomiasis between the human hosts and the contaminated water environment via  
143 larvae multiplication in the intermediate host (freshwater snails). The dynamics of the snail population  
144 are included as an explicit deterministic compartmental model integrated into the ABM.

145 SchiSTOP consists of five main building blocks: the human population, the parasitic worms living in  
146 the human host, the two larval stages living in the contaminated water environment, and the snail  
147 population. The models include human, worm and snail population dynamics via births, aging, and  
148 deaths. For humans, migration is also considered. Infection in humans is then modelled through an  
149 age-specific exposure to water, potentially contaminated with cercariae. Maturation, reproduction, and  
150 death of worms within the human host are governed by stochastic events. Human hosts contribute to  
151 the contaminated water environment through excretion of eggs and thus release of miracidia, which  
152 can infect snails. Infection dynamics in snails bridge the steps between the asexual reproduction of  
153 miracidia in snails and the maturation into cercariae. Diagnostic schemes to assess infection in  
154 humans, and control interventions via 10 annual rounds of MDA are explicitly modelled, assuming  
155 75% coverage [10]. We also take into account that a 5% of the population is systematically excluded  
156 from MDA, and we assume an imperfect drug efficacy of 86% killing rate of adult worms [39].  
157 Detailed specifications of SchiSTOP and a full list of parameters are provided in the **S1 Text**.

158 SchiSTOP allows the implementation of different model variants (from here on called models) by  
159 varying assumptions on parameters and processes describing the dynamics of the disease. For the  
160 scope of this study, we considered and implemented 162 different models that reflect the 27  
161 combinations of three regulating mechanisms acting at different levels of the transmission cycle  
162 (worm, human and snail) at three intensities (absent, mild, strong), as well as two different functions to  
163 model age-specific exposure to the water environment, and three endemicity levels (low, moderate,



164 high). In particular, the three regulating mechanisms act at i) worm-level, through density-dependence  
 165 in egg production, ii) human-level, through anti-reinfection immunity, iii) snail-level, through the  
 166 density-dependent growth of snail population. The two functional choices for the age-specific  
 167 exposure to the water environment are i) a model-based function derived from fitting an established  
 168 schistosomiasis transmission model [21] to observed age-intensity profiles [39] (model-based), and ii)  
 169 an alternative age-exposure function that we estimated from published water contact data [40, 41]  
 170 (water-contacts-based). To inform the latter, we extracted frequency of water contacts adjusted for  
 171 body surface and time of day of contact reported for three age groups (0-9, 10-19, 20+ years old) from  
 172 an extensive data collection on direct water contact observations in a village in Northern Senegal [40].  
 173 To refine the modelling of the exposure in the last age-group (20+), various age-exposure profiles  
 174 from Kenya [41] were used. Both functions are implemented as a relative exposure and displayed in  
 175 **Fig 1A.**

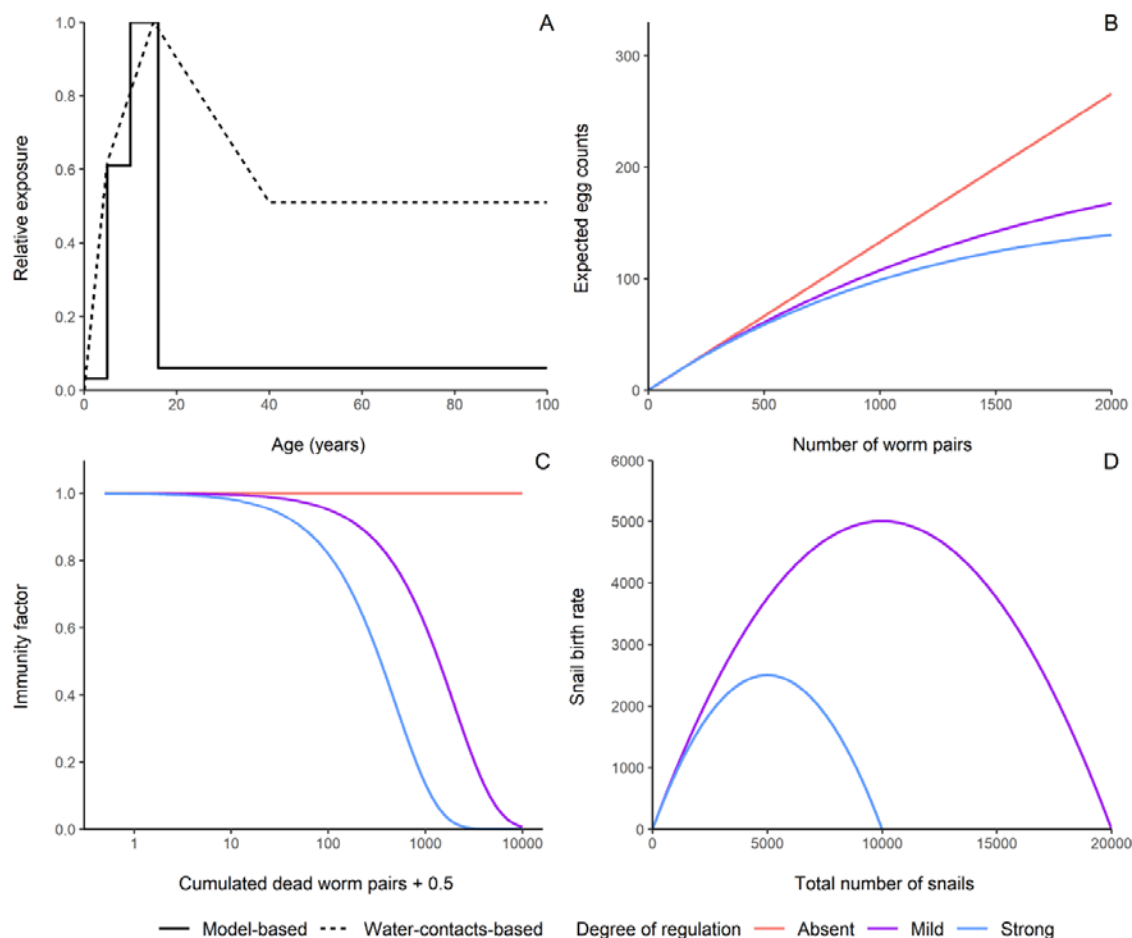

176

177 **Fig 1. Modelling assumptions.**

178 **(A) Age-exposure functions employed in the models.** The functions describe the relative exposure  
179 by age of the human host, using 1.0 for the highest value (i.e., at age 15). Both functions are  
180 interpolations of reported data points: the solid line is a piece-wise constant function representing the  
181 relative exposures derived from literature (model-based exposure function) at 0, 5, 10, and 16+ years  
182 of age. The dashed line is a piece-wise linear function based on the relative exposures extracted from  
183 published water contacts data at 0, 5, 15, and 40+ years of age. **(B) Worm-level regulation.** The  
184 expected egg counts are function of the number of mature worms, which are modelled as pairs within  
185 the human host. The mean number of eggs per sample  $\alpha$  is set at 0.13 (Absent), 0.14 (Mild), or 0.18  
186 (Strong). The density-dependence parameter  $z$  is set at 0 (Absent), 0.0007 (Mild), or 0.004 (Strong).  
187 **(C) Human-level regulation.** The immunity factor is displayed as a function of cumulated dead  
188 worms, presented on a logarithmic scale. The immunity coefficient  $\alpha_{imm}$  is 0 (Absent), 0.0005 (Mild),  
189 or 0.002 (Strong). **(D) Snail-level regulation.** The snail birth rate, following a logistic growth, is  
190 displayed as a function of the total number of snails. The snail carrying capacity  $K$  is set at 20000  
191 (Mild), or 10000 (Strong). When no regulation at the snail-level is assumed, the model does not  
192 include explicit snail dynamics, therefore the corresponding degree is not displayed.

193

194 **Worm-level regulation: density-dependent egg production**

195 We consider mature worms to live in pairs within the human host. For each human individual  $i$ , the  
196 relationship between the expected excreted egg load ( $\mu_i$ ) and the number of carried adult worm pairs  
197 ( $wp_i$ ), is implemented as an exponential saturating function, describing density-dependent fecundity of  
198 female worms as follows:  $\mu_i = \alpha wp_i e^{-zfw_i}$ . In this function,  $fw_i = wp_i/2$  approximates the  
199 female worm load, the parameter  $\alpha$  represents the maximum fecundity of female worms (i.e., the  
200 expected egg produced per worm pair in absence of density-dependence) and  $z$  is a parameter dictating  
201 the level of saturation in egg production. The worm-level regulating mechanism for different values of  
202 the parameters  $\alpha$  and  $z$  is displayed in **Fig 1B**. The values of  $\alpha$  and  $z$  were set to numbers available  
203 from previous work or tuned to produce a mild or strong regulation. To do so, we first set  $z$  to 0 and  
204 assign  $\alpha$  the value from literature [42] in absence of worm-level regulation, assuming the excreted egg  
205 load ( $eggs_i$ ) to linearly depend on the number of adult worm pairs. Secondly, for parametrising a  
206 strong worm-level regulation, we set  $z$  from literature [17] and tuned  $\alpha$  to reproduce the same initial

207 growth as in absence of density-dependence. Finally, we tuned both parameters for a mild worm-level  
208 regulation.

209

### 210 **Human-level regulation: anti-reinfection immunity**

211 The human immunological response, which develops naturally, is assumed to be induced by the death  
212 of adult worms, as proposed in published immunological studies [33, 43]. Immunity protects the host  
213 from reinfection by hindering the maturation of cercariae into adult worms, and the amount of this  
214 immunity increases as a function of the cumulative number of died adult worms. The model describes  
215 this behaviour via an immunity factor given by  $\exp(-\alpha_{imm} dwp)$ , which reduces the rate of parasite  
216 acquisition by the human host. Here,  $\alpha_{imm}$  is the immunity parameter and  $dwp$  is the individual  
217 cumulated dead worm burden, defined in terms of worm pairs and inclusive of worms undergone both  
218 natural mortality and mortality upon MDA. We do not consider decay of immunity within the human  
219 lifespan. The human-level regulating mechanism for different values of  $\alpha_{imm}$  is displayed in **Fig 1C**.  
220 The immunity factor is multiplied times the exposure rate, which determines the force of infection  
221 acting on humans ( $FOI_h$ ). In absence of anti-reinfection immunity, we set  $\alpha_{imm}$  to 0, implying that the  
222 past exposure to infection (and therefore death of worms) does not affect the chance to acquire new  
223 parasites. As a reference for a strong human-level regulation, we extracted  $\alpha_{imm}$  from literature [32].  
224 We set the parameter to a lower value to define a mild degree of regulation.

### 225 **Snail-level regulation: density-dependent population growth**

226 The snail phase of the parasite life cycle is explicitly modelled through an equation-based framework  
227 and embedded into each ABM. We employed a deterministic compartmental model to simulate births,  
228 deaths, exposure, and infection of snails. Susceptible snails  $S(t)$  reproduce according to a logistic  
229 growth with birth rate  $\beta(t)$  due to competition for resources:

$$\beta(t) = \beta_0 \left(1 - \frac{N_s(t)}{K}\right) (S(t) + E(t))$$

230 Here,  $\beta_0$  is the maximum reproduction rate in absence of competition [36],  $N_s(t)$  the total snail  
231 population size, and  $K$  the carrying capacity. The birth rate of snails, dictating the snail-level  
232 regulating mechanism, is displayed in **Fig 1D**, for different values of  $K$ . The carrying capacity  $K$  was  
233 tuned to parametrise a mild or strong degree of the snail-level regulating mechanism.

234 Susceptible snails can be invaded by miracidia present in the water environment after egg excretion by  
235 human hosts and become exposed ( $E(t)$ ). The force of infection acting on snails  $FOI_s$ , is proportional to  
236 the abundance of miracidia, through a coefficient  $\eta$  representing the transmission parameter on snails.  
237 Miracidia live in exposed snails for a period during which they mature and asexually reproduce into  
238 cercariae. Susceptible and exposed snails undergo natural mortality, according to a mortality rate  
239  $\nu$  [36]. When the parasites are mature, the snails become infected  $I(t)$  at a rate  $\tau$  equal to the inverse of  
240 their assumed maturation period [17, 44]. Infection on snails causes an increased mortality ( $\nu_I$ ) and  
241 castration [36]. Therefore, only susceptible and exposed snails contribute to reproduction (see  
242 formulation of  $\beta(t)$ ). Infected snails shed cercariae  $C(t)$  into the environment, according to a cercarial  
243 per capita production rate  $\lambda$  [36]. The abundance of shed cercariae determines the force of infection  
244 acting on humans  $FOI_h$ . Cercariae naturally die with a rate  $\gamma$  before infecting humans. The dynamics of  
245 this module are thus described by the following system of ordinary differential equations.

$$\frac{dS(t)}{dt} = \beta - (v + FOI_s) S(t)$$

$$\frac{dE(t)}{dt} = FOI_s S(t) - (v + \tau) E(t)$$

$$\frac{dI(t)}{dt} = \tau E(t) - \nu_I I(t)$$

$$\frac{dC(t)}{dt} = \lambda I(t) - \gamma C(t)$$

246 When there is no regulation at the snail-level, we assume that the cercarial uptake by the environment  
247 at time  $t$  coincides with the number of miracidia excreted at the previous time step, which coincides

248 with the maturation period into the intermediate host (1 month). The full list of parameters and the  
249 specifications of the snails' infection dynamics can be found in **S1 Text**, Intermediate host.

250

## 251 **Simulations**

252 Three parameters, namely the overall transmission parameter on humans  $\zeta$ , the level of worm  
253 aggregation  $k_w$ , and the transmission parameter on snails  $\eta$ , were varied within a grid search  
254 framework with the aim to initiate all models at the same setting of either low, moderate, or high  
255 endemicity. The initial settings were defined on the basis of three prevalence indicators and their  
256 targets informed from literature: the infection prevalence in SAC, as per WHO definition (average of  
257 10%, 30%, 60%, in low, moderate, and high endemicity, respectively) [10], the prevalence of heavy  
258 infections in SAC (average of 0%, 6%, 20%) [45], and prevalence of infection in snails (average of  
259 6% in all settings) [37]. First, a visual inspection of the three prevalence indicators allowed refining  
260 the search. The prevalence of infection in snails is mostly influenced by the parameter  $\eta$ , about which  
261 very little information is available. We therefore swept the parameter  $\eta$  until the models reproduced a  
262 prevalence in snails close enough to the target value (6%). Afterwards, the grid search for the three  
263 transmission parameters was performed in the reduced space and the parameters' values minimising  
264 the root mean squared error (RMSE) between the predicted and desired targets, were chosen for each  
265 model. The RMSE was computed combining and scaling the three target indicators with most of the  
266 weight assigned to the prevalence of any infection in SAC, which was allowed to vary about  $\pm 0.1\%$   
267 with respect to the desired threshold. The file with selected parameters for each model and the full  
268 code is publicly available at <https://github.com/VeronicaMalizia/SchiSTOP>. SchiSTOP was  
269 implemented and run using R programming language 4.2.2 [46].

270 After the selection of parameters, we ran 100 stochastic simulations for each model to capture inherent  
271 models' variability and used the average trends for comparison. We assessed and compared the ability  
272 of each model to explain three observable patterns: i) the age-intensity profiles expressed as mean  
273 detected eggs per gram (epg) of faeces as a function of age, ii) the effect of 10 annual rounds of MDA  
274 administered to SAC, iii) the rebound of prevalence after treatment. The number of eggs per gram of

275 faeces (epg) is expressed as geometric mean across age groups (see **S1 Text**, Human Demography)  
276 and stochastic realizations of the models. Although geometric means lead to biased estimators of the  
277 true mean, they have traditionally been used in the analysis of data from field studies [47]. We defined  
278 models as successful when they could i) reproduce a convex age-intensity curve with a typical peak of  
279 intensity of infection in adolescents, ii) bring the prevalence down of at least 20% of their pre-control  
280 levels after 10 years of MDA, and iii) result in a rebound of prevalence to values close to pre-control  
281 levels, after stopping MDA, even in low endemicity settings [1, 48-50]. After stopping MDA, we  
282 expect that the prevalence of infection in SAC should go back to pre-control levels within 20 years. In  
283 order to parametrise the model and define the above-mentioned criteria for model plausibility, we  
284 undertook an expert elicitation process that involved multiple steps. We first identified experts in the  
285 field ranging from parasitology, epidemiology, experimental and field research. All experts had a  
286 strong publication record, practical experience, and a deep understanding of the disease dynamics. All  
287 experts were informed about the purpose of the expert elicitation process, the goals of our research,  
288 and the specific areas in which we sought expertise. In particular, we conducted structured interviews  
289 and one workshop, all organized within the SchiSTOP project [51]. We asked questions related to 1)  
290 the role of the intermediate host and how to interpret malacological surveys, 2) exposure and  
291 mechanisms of immunity in terms of triggers, protection, and decay and 3) prevalence patterns before  
292 and after control.

293 Lastly, we used the successful models to compare the predicted probabilities (based on 100 repeated  
294 simulation runs) to meet the control targets of EPHP and IOT, considering two different treatment  
295 strategies: 10 rounds of annual MDA administered to SAC (school-based), and 10 rounds of annual  
296 MDA administered to all individuals older than 2 (community-wide), as per the most recent WHO  
297 guidelines towards the 2030 targets [10]. EPHP is reached when the prevalence of heavy intensity of  
298 infections in SAC is below 1%, and IOT when the prevalence of any intensity of infection in SAC is  
299 0.0%. We define a stochastic run to have met the target if the prevalence indicator is still below the  
300 control threshold 50 years since the end of the MDA programme.

## 301 **Results**

### 302 **Reproducing initial settings**

303 The defined initial settings of low, moderate, and high endemicity were reproducible only with a  
304 subset of models (147 out of 162). Clearly, the presence of at least one regulating mechanism is  
305 required to reproduce a stable endemic equilibrium for all three endemicity settings. In addition,  
306 adopting the model-based age-exposure function, worm- and human-level regulation alone was not  
307 sufficient to reproduce a stable low endemic equilibrium ( $\leq 10\%$  prevalence of any infection in SAC).  
308 Explicit snail population dynamics at any intensity of regulation is essential for reaching low stable  
309 endemic equilibria. With the alternative definition of age-exposure function based on water contacts  
310 we found that any regulating mechanism can initiate the model in a low endemicity setting. In  
311 particular, snail-level regulation allows very low endemic equilibria.

312 When the system does not reach the required endemic equilibrium, the number of simulated cercariae  
313 in the environment and the average worm load in humans can either grow without upper limits,  
314 leading quickly to an endemicity setting where the entire population is infected, or die out, leading to a  
315 disease-free situation. Models without any regulating mechanism and models without snail-level  
316 regulation combined with the model-based exposure function are not successful in reproducing stable  
317 equilibria for all endemic settings and have therefore been excluded from the assessment of further  
318 results. Only exception to this exclusion is the model based on strong worm-level regulation alone and  
319 model-based exposure function. Although this model does not allow to generate steady initial settings  
320 with low endemicity, it is included for reference in further comparisons, as current models for policy  
321 use the same assumptions.

### 322 **Reproducing observed epidemiological patterns**

#### 323 **Age-intensity profiles**

324 The assumptions on human-level regulation via immunity and on the age-exposure functions have the  
325 largest impact on the resulting shape of the age-intensity profiles, whereas varying assumptions on

326 regulation occurring at worm- and snail-level has a minor effect. **Fig 2** compares the age-intensity  
327 profiles for different degrees of regulation in humans (immunity, by colours) and both age-exposure  
328 functions, for all three endemicity settings. The figure shows that the peak in intensity of infection  
329 reproduced by all models is followed by i) a steep drop for adults with the model-based exposure  
330 function, and ii) a smoother decline in adults leading to higher egg counts, using the exposure function  
331 based on water contacts. In the latter, implementing human-level regulation from absent to strong,  
332 shifts the peak from 20 to 10 years old on average and considerably decreases the mean intensity in  
333 adults. Interestingly, despite a relatively high exposure in adults assumed by the water contacts-based  
334 exposure function, a strong regulation in humans can explain the low intensity of infection in adults  
335 (20+) that is sometimes observed in specific exposure settings (**Fig 2D** and **2F**). The effect of  
336 immunity on the intensity of infection is not seen in low endemicities, because the accumulation of  
337 dead parasites in human hosts is too low to trigger an immune response.

338 Observed age-intensity profiles from three Kenyan villages published elsewhere [52] are also plotted  
339 in **Fig 2** (black lines) for comparison with simulated profiles. It can be seen that the model-based  
340 exposure function allows to reproduce high endemicity settings, but the water contacts-based exposure  
341 function requires a degree of regulation in humans to reproduce low intensity in adults. This is  
342 different in moderate endemicity settings, where the effect of the model-based exposure function on  
343 the age-intensity profiles is likely to be too strong at older ages, with respect to the alternative  
344 exposure function.

345 The age-intensity profiles disaggregated for all models are displayed in **S1 Appendix**.



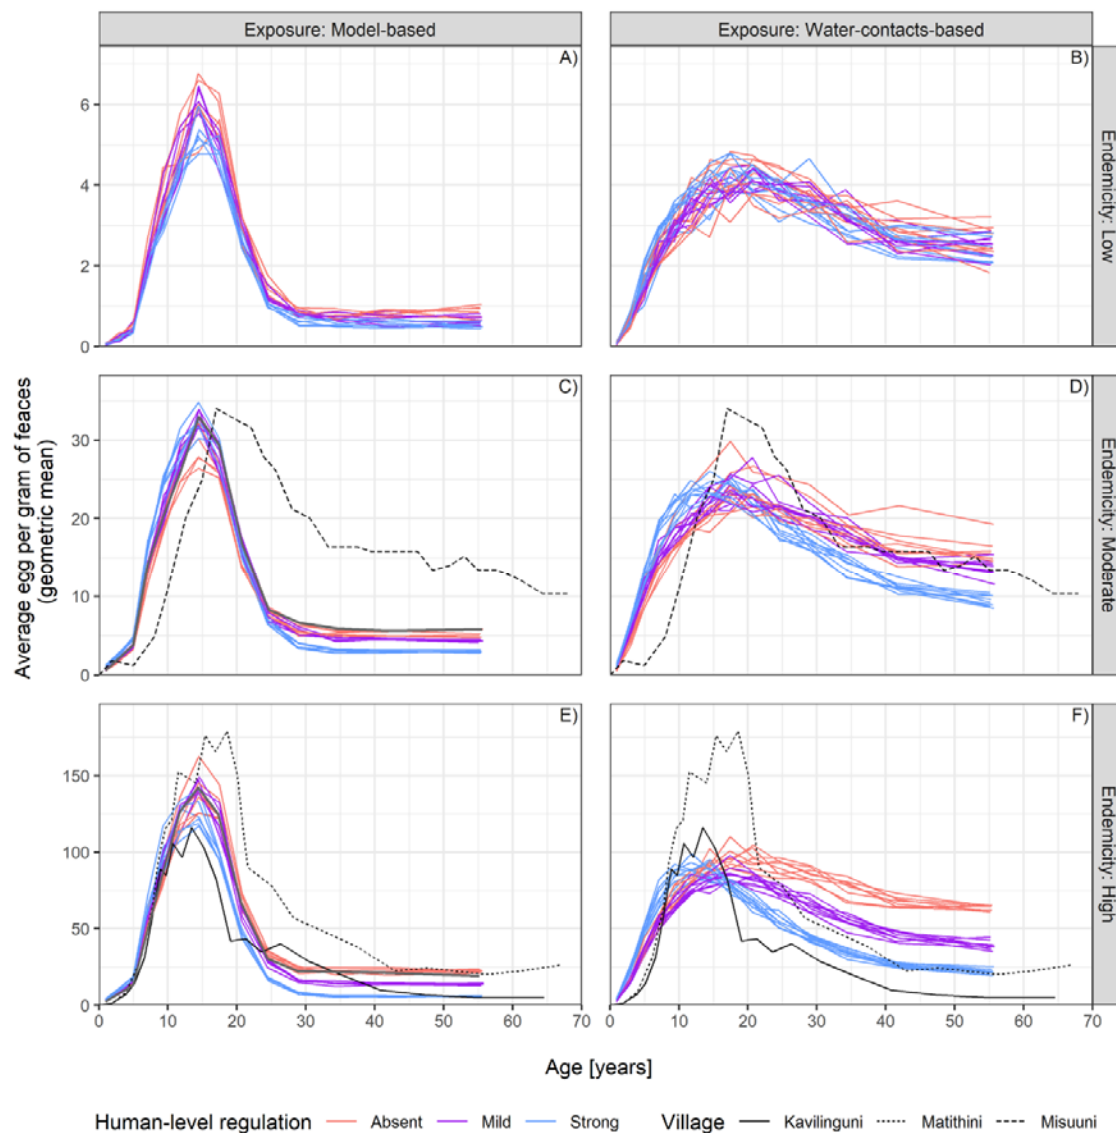

346

347 **Fig 2. Age-intensity profiles by varying assumptions on age-exposure and immunity mechanism.**  
 348 For each choice of the age-exposure function (columns) and different endemicity settings (rows), a  
 349 single panel shows the simulated egg counts on the y-axis (mean egg is displayed, over age group and  
 350 100 stochastic realizations of the models) by age on the x-axis. The age-intensity profiles are displayed  
 351 at pre-control, for all models that could successfully reproduce all three pre-control endemicity  
 352 settings. Each line depicts results from a single model. The degree of regulation assumed at human  
 353 level via immunity is highlighted with different colours. Lines of the same colour are due to  
 354 combinations (3x3) of worm- and snail-level regulation, given the same choice of immunity. Age bins  
 355 are defined as to have the same number of individuals in each bin. The grey line in the left-hand-  
 356 panels (C and E) represents a model with strong worm-level regulation only and the model-based  
 357 exposure function. This model does not allow to generate stable initial settings with low endemicity,

358 but it is included here for reference, as current models for policy use the same assumptions. The black  
359 lines indicate age-intensity profiles observed in three Kenyan villages and published elsewhere [52].

360

### 361 **Effectiveness of MDA and prevalence bounce-back**

362 All models reproduce similar decreasing trends of prevalence during MDA (**Fig 3**). Assumptions on  
363 human-level regulation and the chosen age-exposure function are the main determinants of the drop in  
364 SAC prevalence due to treatment, depending on the endemicity setting. With a model-based exposure  
365 function, MDA has a stronger effect on prevalence in SAC. The prevalence drops to lower levels after  
366 5 MDA rounds if compared to the results obtained by using the exposure function based on water  
367 contacts. This can be explained by the fact that the simulated control strategy targets the SAC group,  
368 where most of the exposure occurs, particularly in the model-based exposure function. A strong  
369 regulation in humans also predicts a more effective treatment with respect to assuming absent or mild  
370 regulation. In fact, MDA itself contributes to the development of anti-reinfection immunity by its  
371 acting mechanisms that kills adult worms [29].

372 The ability of each model to reproduce the natural prevalence bounce-back is further shown in **Fig 3**,  
373 by the prevalence trends up until 20 years after the last MDA round. The figure shows that the  
374 combination of the age-exposure function based on water contacts and a mild or strong degree of  
375 regulation in snails is essential to reproduce a bounce-back of prevalence close to pre-control levels in  
376 all endemicity settings, within 20 years after termination of the MDA programme. The rationale for  
377 this result lies in a reduced impact of treatment as a consequence of the water contact-based exposure  
378 function, as previously explained, in addition to higher values of transmission parameters required if  
379 considering snail-level regulation. By assuming a strong regulation at human level, the bounce-back is  
380 much more prominent, although the prevalence drops to lower values during treatment with respect to  
381 assuming the regulation to be absent or mild. In fact, assuming strong regulation at human level  
382 requires higher transmission parameters in order to reproduce the initial endemicity settings. The  
383 models found successful in explaining a plausible rebound of prevalence after treatment are not  
384 significantly influenced by the degree of worm-level regulation considered.

385

386 The timelines of SAC prevalence during and after the MDA programme disaggregated for all models  
387 are displayed in **S2 Appendix**. Overall, the models that were successful in explaining observed  
388 patterns (blue lines in second and third columns in **Fig 3**), both in terms of pre-control age-intensity  
389 profiles and bounce-back of prevalence after treatment were those that combined an age-exposure  
390 function based on water contacts with a mild or strong degree of regulation at both snail- and human-  
391 level.

392

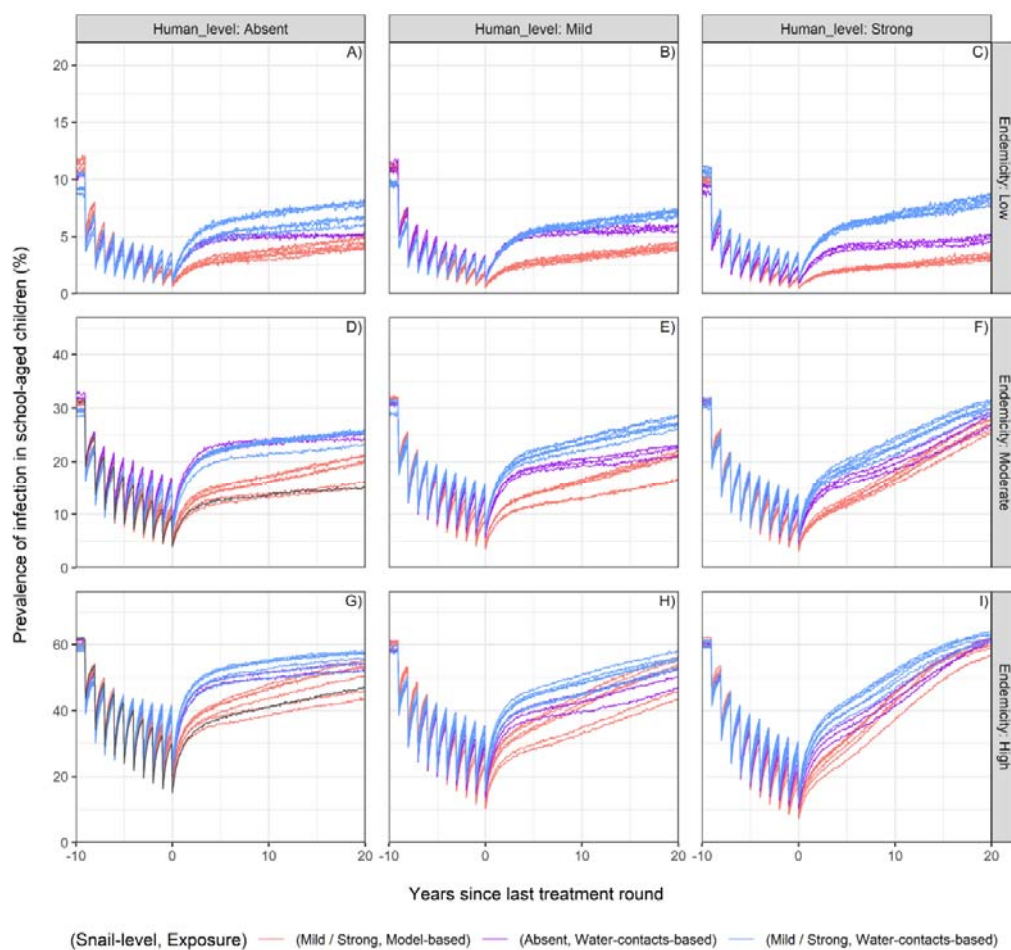

393

394 **Fig 3. Prevalence timelines in SAC during and after treatment.**

395 For different degree of human-level regulation via immunity (columns) and different endemicity  
396 settings (rows), single panels show the infection prevalence in school-aged children on the y-axis  
397 (mean of 100 stochastic realizations of the model) by years since the last treatment round on the x-  
398 axis, for all models that could successfully reproduce all three pre-control endemicity settings. Each

399 line depicts results from a single model. Lines of the same colour represent groups of models as  
400 indicated in the legend. The grey line in panels D) and G) represents a model with a strong worm-level  
401 regulation only and the model-derived exposure function. The model is excluded from the analyses  
402 because it does not allow stable initial settings with low endemicity, but it is added here for reference  
403 as current models for policy use the same assumptions. For all models, treatment is annually  
404 administered to 5-15 years old individuals with a coverage of 75%, 5% of target population  
405 systematically untreated, and a drug efficacy of 86%.

## 406 **Feasibility to reach the control targets**

407 Despite reproducing similar epidemiological patterns, successful models can still differ in their  
408 predictions of probability to reach the control targets. Results that follow include only such selected  
409 models, with the exception of the model based on only strong worm-level regulation and model-based  
410 exposure function, as current models for policy use the same assumptions.

## 411 **Reaching control targets with 10-year annual MDA to school-aged children**

412 We found that all models agree that treating SAC only with 10 years of annual MDA will not allow to  
413 reach the EPHP in high or moderate endemicity settings. In low endemicities, we start from a setting  
414 where the prevalence of high intensity infection in SAC is already below 10% (EPHP has already been  
415 met). Here, the target of interest is the IOT and none of the models predict a positive probability to  
416 reach this target despite 10 rounds of annual MDA to SAC.

## 417 **The impact of community-wide annual MDA**

418 Expanding the 10-year annual MDA programme to all individuals older than 2 years of age, leads to  
419 EPHP in low-endemicity settings for all successful models. The probability to reach EPHP in  
420 moderate endemicity settings turns to a range varying from 58% to 100% in all models with a mild  
421 human-level regulation (**Fig 4**). The mechanism of anti-reinfection immunity (human-level regulation)  
422 has the highest impact on the probability to reach EPHP: a strong human-level regulation decreases  
423 the probability to a range between 15% and 28% combined with another regulating mechanism (snail  
424 or worm) (**Fig 4**). In fact, a strong human-level regulation is associated with higher transmission and  
425 larger heterogeneity of worms (input files with transmission parameters can be found in the public

426 repository <https://github.com/VeronicaMalizia/SchiSTOP>) in the human hosts to reproduce the initial  
 427 endemic setting. In high endemicity settings, it is still feasible to reach EPHP with a probability  
 428 ranging between 2% – 46% if human-level regulation is mild. The probability shows a decreasing  
 429 trend if mild to strong worm-level regulation is assumed. In fact, worm-level regulation mechanism  
 430 decreases the impact of MDA as individuals with high worm loads will still have a similar egg output  
 431 after treatment, therefore keeping their contribution to transmission. Consequently, prevalence  
 432 rebounds earlier than in models without worm-level regulation, when a linear relationship between  
 433 worm burdens and expected egg counts is assumed. According to all other models, the probability to  
 434 reach EPHP is close to zero in high endemicity settings (**Fig 4**).

**Probability to elimination as a public health problem**

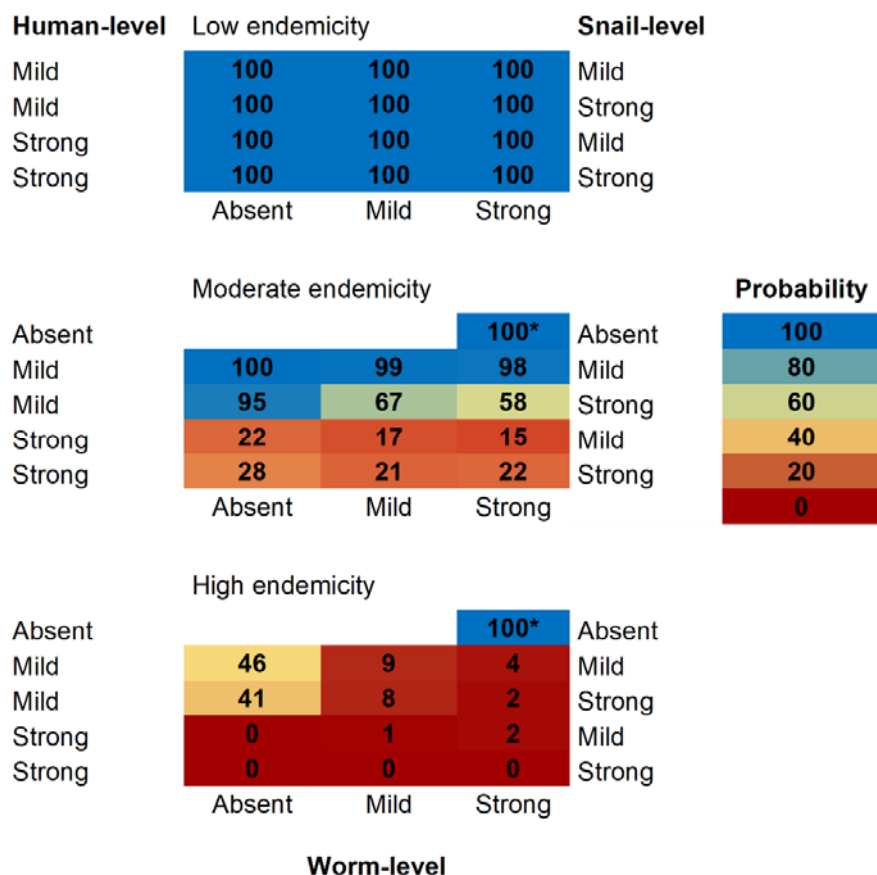

435

436 **Fig 4. Probability to reach elimination as a public health problem with a 10-year annual MDA to**  
 437 **all individuals older than 2.** The figure reports predictions for the probability (portion of stochastic

438 runs monitored at 50 years after end of treatment) of reaching elimination as a public health problem  
439 (EPHP, prevalence of heavy infections in school-aged children < 10%), across models successful in  
440 reproducing all observed patterns for schistosomiasis. Successful models assume an age-exposure  
441 function based on water contacts. Regulating mechanisms can be at human-level (left side, via  
442 immunity), snail-level (right side, via density-dependence in population growth), and worm-level  
443 (bottom, via density-dependence in egg production). \*This model assumes a strong worm-level  
444 regulation only and the model-derived age-exposure function. It was not successful in reproducing  
445 observed patterns within our modelling framework but is added here for reference as current models  
446 for policy use the same assumptions. For all models, treatment is annually administered to 2+ years  
447 old individuals with a 75% coverage, 5% of target population systematically untreated, and a drug  
448 efficacy of 86%.

449

450 Community-wide MDA also increases the chances of reaching IOT with respect of only treating SAC,  
 451 even in moderate (15 – 41 %) and high (0 – 7 %) endemicity settings (**Fig 5**). The probability of  
 452 interrupting transmission in low endemicity settings jumps from 0% (if treating only SAC) to a range  
 453 of 88 – 98% across the different models. The probability to reach both control targets was found to be  
 454 higher when using assumptions as employed in current models used for policy (marked by \*).  
 455

### Probability to interruption of transmission

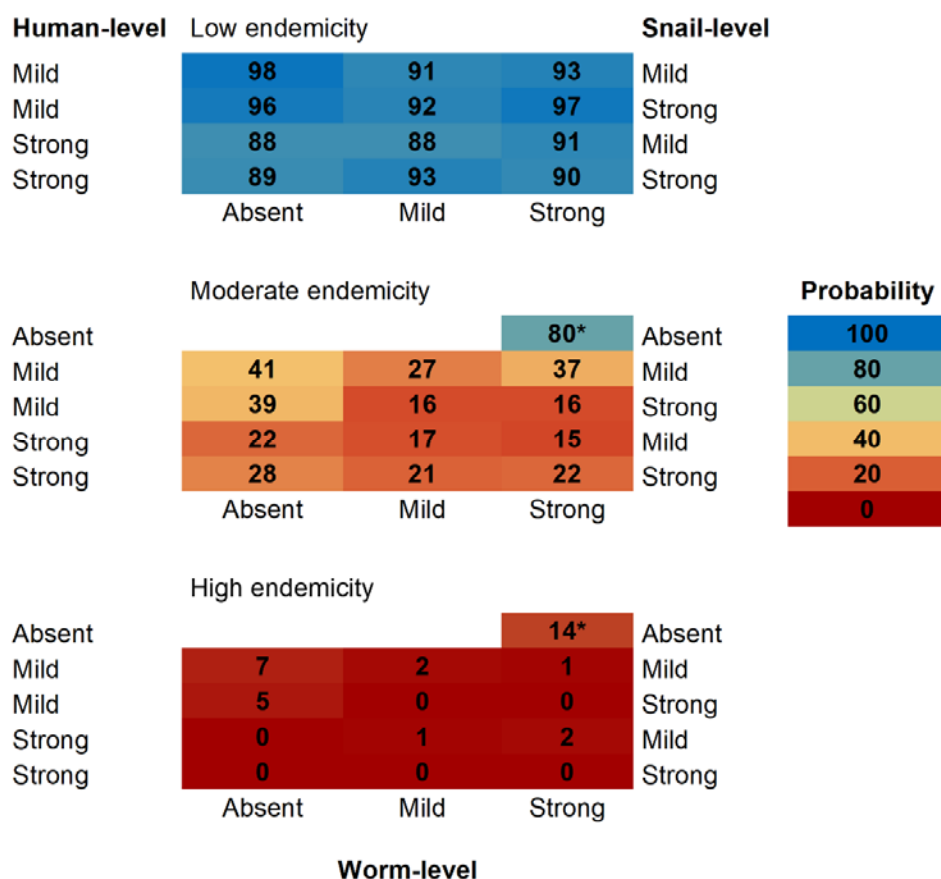

456

457 **Fig 5. Probability to reach interruption of transmission by 10-year annual MDA to all**  
 458 **individuals older than 2.** The figure reports predictions for the probability (portion of stochastic runs  
 459 monitored at 50 years after end of treatment) of reaching interruption of transmission (0% prevalence  
 460 of any infection in school-aged children), across models successful in reproducing all observed  
 461 patterns for schistosomiasis. Successful models assume an age-exposure function based on water  
 462 contacts. Regulating mechanisms can be at human-level (left side, via immunity), snail-level (right



463 side, via density-dependence in population growth), and worm-level (bottom, via density-dependence  
464 in egg production). \* This model assumes a strong worm-level regulation only and the model-derived  
465 age-exposure function. It was not successful in reproducing observed patterns within our modelling  
466 framework, but it is added here for reference as current models for policy use the same assumptions.  
467 For all models, treatment is annually administered to 2+ years old individuals with a 75% coverage,  
468 5% of target population systematically untreated, and a drug efficacy of 86%.

## 469 **Discussion**

470 The objective of our study was to revisit the modelling assumptions on the regulating mechanisms for  
471 the transmission of *S. mansoni* and to investigate the impact of such assumptions on the feasibility to  
472 reach the WHO control targets. To do so, we developed SchiSTOP, a new modelling framework for  
473 the transmission dynamics of *S. mansoni*. SchiSTOP was used to run a large number of simulations,  
474 varying the assumptions on the regulating mechanisms and the age-exposure to infection.

475 We found that not all combinations of regulating mechanisms and age-exposure function can  
476 successfully reproduce the defined pre-control endemicity settings (low, moderate, high). In particular,  
477 without regulating mechanisms, the system leads quickly to settings where the entire population is  
478 highly infected, as previously demonstrated in other modelling studies [53]. Moreover, stable low  
479 endemic equilibria (prevalence of infection in SAC  $\leq 10\%$ ) cannot be reproduced with the modelling  
480 assumptions on age-exposure and only worm-level regulation that are considered in current models  
481 used for policy. To our knowledge, there are no schistosomiasis modelling studies in the literature that  
482 aim to focus on low transmission settings. We found that snail-level regulation is crucial to reproduce  
483 low stable endemic equilibria, within SchiSTOP. In fact, snail dynamics with a varying carrying  
484 capacity can stabilise the system providing a continuous reservoir of infection even at very low  
485 transmission levels in humans, thanks to the force of infection acting on snails which contributes to  
486 maintain transmission. Overall, our results show that a degree of regulation in snails and in humans  
487 combined with the water contacts-based exposure function is needed to reproduce expected age-  
488 intensity profiles and a plausible rebound of prevalence after termination of an MDA programme.



489 The assumptions made on the regulating mechanisms are particularly relevant when the models are  
490 used for policy recommendations. In fact, the predicted probabilities to reach the control targets differ  
491 across successful models, and they are overall lower compared to the predictions obtained using the  
492 regulation assumptions of current models used for policy recommendations. Results show that  
493 according to all successful models, it is unlikely to meet EPHP and IOT when treating SAC only. If  
494 MDA is expanded to community-wide treatment of all individuals older than 2, the feasibility  
495 increases, even regarding IOT in moderate and high endemicity. This is in line with previous studies  
496 [54].

497 The present work also highlights the importance of informing the age-exposure function with water  
498 contact data. In fact, the model-based age-exposure function only performs well in reproducing age-  
499 intensity profiles in high endemicity settings, while the drop in intensity of infection at older ages may  
500 be too strong in lower endemicities. This is because this function was derived from fitting a  
501 transmission model solely considering regulation at worm level to the age-intensity profiles from  
502 different African villages, all characterized by high endemicity [11, 15, 17, 55, 56]. Available data  
503 show that age-intensity profiles, although generally peaking in 10-20 years old, can appear differently  
504 in older ages describing heterogeneities in endemicity, exposure, and regional-specific settings [47].  
505 The alternative age-exposure function based on water contacts has the ability to reproduce the variety  
506 in age-intensity profiles, with immunity leading to a peak shift to lower ages and lower intensity in  
507 adults [57]. Here we show that some degree of human-level regulation via immunity is likely to occur  
508 in order to explain observed age-intensity relationships in high endemicity settings, using the water  
509 contacts-based exposure function. A recently published review provided evidence for water contacts  
510 being robustly associated with infection in both children and adults, across heterogeneous settings.  
511 These findings [58] shed light on the definition of at-risk populations and therefore in need of  
512 treatment and highlight the need of standardised tools for exposure measurements. However, how to  
513 properly define and quantify exposure to infection on the basis of observable data such as number of  
514 contacts with contaminated water, duration of contact and area of the body exposed, remains a  
515 challenge.

516 Overall, the modelling assumptions commonly employed in schistosomiasis modelling and used for  
517 informing control strategies (i.e., in terms of age-exposure and only worm-level regulation) are found  
518 not adequate to reproduce low endemic pre-control settings and rebound of prevalence after MDA,  
519 within SchiSTOP. Predictions to reach the control targets under those assumptions are generally more  
520 optimistic compared to the same predictions for the successful models in our study. This is because i)  
521 with a model-based function, the MDA has a stronger effect on prevalence in SAC, ii) the assumption  
522 of a strong worm-level regulation requires lower transmission parameters and a higher heterogeneity  
523 of worms to represent moderate and high endemicity scenarios, compared to those required by other  
524 regulating mechanisms.

525 Our modelling framework, SchiSTOP, has some limitations, mainly related to the limited knowledge  
526 and reliability of data available to more precisely parametrise regulating mechanisms. In particular, we  
527 assumed that acquired immunity leads to a protective effect towards repeated infections, as suggested  
528 for *S. mansoni* [33]. However, the long-term dynamics of immunity still constitute a research and data  
529 gap [33]. While the current understanding points towards a slow development of immunity triggered  
530 by the death of adult worms (both naturally and by praziquantel therapy) [59], not much is known  
531 about the duration of such protection. We chose not to account for a decay of anti-reinfection  
532 immunity for the scope of these analyses. In addition, some studies suggest that the main effect of  
533 acquired immunity is a decrease in worm fecundity. This has been proposed for *S. haematobium* [60,  
534 61], but does not seem to be the case for *S. mansoni* [33, 62]. The assessment of infection in snails is  
535 also subject to uncertainty due to sampling procedures, and diagnostic methods to assess infection.  
536 Field and laboratory data have shown that the detected prevalence of infected snails (thus shedding  
537 cercariae) is usually quite low [37, 63-66], but exhaustive explanation of such low prevalence is  
538 lacking and no evidence of correlation between infection rates in snails and humans has been  
539 identified. We chose a fixed 6% prevalence of infection in snails to define all three endemicity initial  
540 settings. Molecular tools and genetic data are further necessary to deepen our understanding of  
541 variations in susceptibility to schistosome species by specific intermediate host snails.

542 Furthermore, we compute probability of IOT as number of stochastic runs that meet the target up to 50  
543 years after termination of the MDA programme, despite monitoring and evaluation in the field are  
544 likely to occur within shorter time intervals [10], to ensure capturing pathways of late recrudescence.  
545 A rebound after elimination, as well as maintained low transmission, can nevertheless occur via other  
546 mechanisms like movement of infected individuals [67] or cercariae/snail movement through water  
547 stream. SchiSTOP does not take this into account, and we consider it to play a minor role for  
548 schistosomiasis, given its focal nature [3].

549 In this work, SchiSTOP has been used to revisit the assumptions of regulating mechanisms for *S.*  
550 *mansoni* transmission. However, its formulation is suitable to answer diverse research questions about  
551 the epidemiology and control of schistosomiasis. For instance, the presence of a specific module for  
552 the dynamics in snails allows for a thorough assessment of the impact of snail control interventions.

553 In conclusion, the present work highlights the importance of considering regulating mechanisms at  
554 different levels of the transmission cycle in models for schistosomiasis transmission and control, as  
555 they largely determine the predicted impact of interventions. We showed that some degree of  
556 regulation in both snail- and human-level is required to explain observed epidemiological patterns  
557 typical for schistosomiasis. Our findings support the current WHO guidelines, recommending  
558 community-wide treatment to all individuals > 2 years old. This control strategy greatly enhances the  
559 probability to reach the control targets, also in high endemicity settings. However, the probability to  
560 reach these targets is likely not as high as predicted by the currently used models that only assume  
561 worm-level regulation. We stress on the need for a better understanding of the mechanisms regulating  
562 transmission and persistence of schistosomiasis in endemic settings.

## 563 **Supporting information**

564 **S1 Text. Full specification of SchiSTOP and complete list of parameters employed for the**  
565 **analyses.**

566 **S1 Appendix. Age-intensity profiles for the complete set of models.** For each choice of the age-  
567 exposure function and each endemicity setting (titles), single panels refer to a fixed combination of the

568 assumptions of worm-level regulation (columns) and snail-level regulation (rows). A single panel  
569 shows the simulated egg counts on the y-axis (mean epg is displayed, over age group and 100  
570 stochastic realizations of the model) by age on the x-axis. The age-intensity profiles are displayed at  
571 stable pre-control settings, by varying the degree of regulating mechanism in humans (colours). Age  
572 bins are defined as to all be equally sized.

573 **S2 Appendix. Effectiveness of treatment and prevalence bounce-back for the complete set of**  
574 **models.** For each choice of the age-exposure function and endemicity setting (titles), single panels  
575 refer to a fixed combination of the assumptions of human-level regulation (columns) and snail-level  
576 regulation (rows). A single panel shows the infection prevalence in school-aged children on the y-axis  
577 (mean of 100 stochastic realizations of the model, single runs as shaded lines) by round of treatment  
578 on the x-axis. The prevalence timelines are displayed by varying the degree of worm-level regulation  
579 (colours). For all models, treatment is annually administered to 5-15 years old individuals with 10  
580 repeated rounds, a coverage of 75%, 5% of target population systematically untreated, and a drug  
581 efficacy of 86%.

## 582 **Acknowledgments**

583 The authors gratefully acknowledge the experts who contributed to the inspiring panel discussions  
584 organized within the SchiSTOP project. The discussions guided the modelling decisions about  
585 regulating mechanisms and interpretation of observed patterns for *S. mansoni*. The participants:  
586 Professor Poppy Lamberton (School of Biodiversity, One Health and Veterinary Medicine, Wellcome  
587 Centre for Integrative Parasitology, University of Glasgow, Glasgow, UK), Dr Stefanie Knopp (Swiss  
588 Tropical and Public Health Institute, Basel, Switzerland), Professor David J Civitello (Department of  
589 Biology, Emory University, Atlanta, GA, USA), Professor Russell J Stothard (Centre for Tropical and  
590 Infectious Diseases, Liverpool School of Tropical Medicine, Liverpool, UK), Dr Antonio Montresor  
591 (Department of Control of Neglected Tropical Diseases, World Health Organization, Geneva,  
592 Switzerland), Dr Maurice Odiere (Neglected Tropical Diseases Unit, Kenya Medical Research  
593 Institute, Centre for Global Health Research, Kisumu), Professor Meta Roestenberg (Department of  
594 Parasitology, Leiden University Medical Center, Leiden, The Netherlands), Dr Govert J van Dam  
595 (Department of Parasitology, Leiden University Medical Center, Leiden, The Netherlands), Dr Jean T  
596 Coulibaly (University of Felix Houphouet-Boigny, Abidjan, Côte d'Ivoire).

597

## 598 **References**

- 599 1. World Health Organization. Ending the neglect to attain the sustainable development goals: A  
600 road map for neglected tropical diseases 2021–2030. Geneva2020.
- 601 2. van der Werf MJ, de Vlas SJ, Brooker S, Looman CW, Nagelkerke NJ, Habbema JD, et al.  
602 Quantification of clinical morbidity associated with schistosome infection in sub-saharan africa. *Acta*  
603 *Trop.* 2003;86(2-3): 125-39.
- 604 3. Colley DG, Bustinduy AL, Secor WE, King CH. Human schistosomiasis. *Lancet.*  
605 2014;383(9936): 2253-64.
- 606 4. Li EY, Gurarie D, Lo NC, Zhu X, King CH. Improving public health control of  
607 schistosomiasis with a modified who strategy: A model-based comparison study. *Lancet Glob Health.*  
608 2019;7(10): e1414-e22.
- 609 5. Wang X, Gurarie D, Mungai PL, Muchiri EM, Kitron U, King CH. Projecting the long-term  
610 impact of school-or community-based mass-treatment interventions for control of schistosoma  
611 infection. *PLoS Negl Trop Dis.* 2012;6(11): e1903.
- 612 6. Hatz C, Vennervald B, Nkulila T, Vounatsou P, Kombe Y, Mayombana C, et al. Evolution of  
613 schistosoma haematobium-related pathology over 24 months after treatment with praziquantel among  
614 school children in southeastern tanzania. *Am J Trop Med Hyg.* 1998;59(5): 775-81.
- 615 7. Pointier JP, Jourdane J. Biological control of the snail hosts of schistosomiasis in areas of low  
616 transmission: The example of the caribbean area. *Acta Trop.* 2000;77(1): 53-60.
- 617 8. Alarcón de Noya B, Ruiz R, Losada S, Colmenares C, Contreras R, Cesari IM, et al. Detection  
618 of schistosomiasis cases in low-transmission areas based on coprologic and serologic criteria: The  
619 venezuelan experience. *Acta Trop.* 2007;103(1): 41-9.
- 620 9. Dejon-Agobe JC, Honkpehedji YJ, Zinsou JF, Edoa JR, Adegbite BR, Mangaboula A, et al.  
621 Epidemiology of schistosomiasis and soil-transmitted helminth coinfections among schoolchildren  
622 living in lambarene, gabon. *Am J Trop Med Hyg.* 2020;103(1): 325-33.
- 623 10. World Health Organization. Who guideline on control and elimination of human  
624 schistosomiasis. Geneva2022.

- 625 11. Anderson RM, Turner HC, Farrell SH, Truscott JE. Studies of the transmission dynamics,  
626 mathematical model development and the control of schistosome parasites by mass drug  
627 administration in human communities. *Adv Parasitol.* 2016;94:199-246.
- 628 12. Macdonald G. The dynamics of helminth infections, with special reference to schistosomes.  
629 *Trans R Soc Trop Med Hyg.* 1965;59:489-506.
- 630 13. Anderson RM, May RM. Population dynamics of human helminth infections: Control by  
631 chemotherapy. *Nature.* 1982;297(5867): 557-63.
- 632 14. Chan MS, Montresor A, Savioli L, Bundy DA. Planning chemotherapy based schistosomiasis  
633 control: Validation of a mathematical model using data on schistosoma haematobium from pemba,  
634 tanzania. *Epidemiol Infect.* 1999;123(3): 487-97.
- 635 15. Truscott JE, Gurarie D, Alsallaq R, Toor J, Yoon N, Farrell SH, et al. A comparison of two  
636 mathematical models of the impact of mass drug administration on the transmission and control of  
637 schistosomiasis. *Epidemics.* 2017;18:29-37.
- 638 16. Collyer BS, Turner HC, Hollingsworth TD, Keeling MJ. Vaccination or mass drug  
639 administration against schistosomiasis: A hypothetical cost-effectiveness modelling comparison.  
640 *Parasit Vectors.* 2019;12(1): 499.
- 641 17. Graham M, Ayabina D, Lucas TC, Collyer BS, Medley GF, Hollingsworth TD, et al. Schistox:  
642 An individual based model for the epidemiology and control of schistosomiasis. *Infect Dis Model.*  
643 2021;6:438-47.
- 644 18. Hu H, Gong P, Xu B. Spatially explicit agent-based modelling for schistosomiasis  
645 transmission: Human-environment interaction simulation and control strategy assessment. *Epidemics.*  
646 2010;2(2): 49-65.
- 647 19. Kura K, Truscott JE, Toor J, Anderson RM. Modelling the impact of a schistosoma mansoni  
648 vaccine and mass drug administration to achieve morbidity control and transmission elimination.  
649 *PLoS Negl Trop Dis.* 2019;13(6): e0007349.
- 650 20. Wang S, Spear RC. Exploring the contribution of host susceptibility to epidemiological  
651 patterns of schistosoma japonicum infection using an individual-based model. *Am J Trop Med Hyg.*  
652 2015;92(6): 1245-52.

- 653 21. Farrell SH, Truscott JE, Anderson RM. The importance of patient compliance in repeated  
654 rounds of mass drug administration (mda) for the elimination of intestinal helminth transmission.  
655 *Parasit Vectors*. 2017;10(1): 291.
- 656 22. Anderson RM, May RM. *Infectious diseases of humans: Dynamics and control*. Oxford:  
657 Oxford university press; 1992.
- 658 23. Cheever AW. A quantitative post-mortem study of schistosomiasis mansoni in man. *Am J*  
659 *Trop Med Hyg*. 1968;17(1): 38-64.
- 660 24. Cheever AW, Kamel IA, Elwi AM, Mosimann JE, Danner R. *Schistosoma mansoni* and s.  
661 *Haematobium* infections in egypt. ii. Quantitative parasitological findings at necropsy. *Am J Trop*  
662 *Med Hyg*. 1977;26(4): 702-16.
- 663 25. Gryseels B, De Vlas SJ. Worm burdens in schistosome infections. *Parasitol Today*.  
664 1996;12(3): 115-9.
- 665 26. Neves MI, Gower CM, Webster JP, Walker M. Revisiting density-dependent fecundity in  
666 schistosomes using sibship reconstruction. *PLoS Negl Trop Dis*. 2021;15(5): e0009396.
- 667 27. Mota-Santos TA, Toledo MMI, Correa MCR, Correa-Olivetra R, Gazzinelli G.  
668 Schistosomiasis from s. *Mansoni* in mice: The relationship between acquired immunity and serum  
669 levels of lethal antibody. *Parasite Immunol*. 1981;3(4): 319-27.
- 670 28. Warren KS. Regulation of the prevalence and intensity of schistosomiasis in man:  
671 Immunology or ecology? *J Infect Dis*. 1973;127(5): 595-609.
- 672 29. Mutapi F, Ndhlovu PD, Hagan P, Spicer JT, Mduluzza T, Turner CMR, et al. Chemotherapy  
673 accelerates the development of acquired immune responses to schistosoma haematobium infection. *J*  
674 *Infect Dis*. 1998;178(1): 289-93.
- 675 30. Chan MS, Anderson RM, Medley GF, Bundy DA. Dynamic aspects of morbidity and acquired  
676 immunity in schistosomiasis control. *Acta Trop*. 1996;62(2): 105-17.
- 677 31. Chan MS, Guyatt HL, Bundy DAP, Booth M, Fulford AJC, Medley GF. The development of  
678 an age structured model for schistosomiasis transmission dynamics and control and its validation for  
679 schistosoma mansoni. *Epidemiol Infect*. 1995;115(2): 325-44.

- 680 32. Chan MS, Mutapi F, Woolhouse MEJ, Isham VS. Stochastic simulation and the detection of  
681 immunity to schistosome infections. *Parasitol.* 2000;120(2): 161-9.
- 682 33. Oettle RC, Wilson S. The interdependence between schistosome transmission and protective  
683 immunity. *Trop Med Infect Dis.* 2017;2(3).
- 684 34. Woolhouse MEJ, Chandiwana SK. Population dynamics model for *Bulinus globosus*,  
685 intermediate host for *Schistosoma haematobium*, in river habitats. *Acta Trop.* 1990;47(3): 151-60.
- 686 35. Gurarie D, Lo NC, Ndeffo-Mbah ML, Durham DP, King CH. The human-snail transmission  
687 environment shapes long term schistosomiasis control outcomes: Implications for improving the  
688 accuracy of predictive modeling. *PLoS Negl Trop Dis.* 2018;12(5): e0006514.
- 689 36. Civitello DJ, Angelo T, Nguyen KH, Hartman RB, Starkloff NC, Mahalila MP, et al.  
690 Transmission potential of human schistosomes can be driven by resource competition among snail  
691 intermediate hosts. *PNAS.* 2022;119(6): e2116512119.
- 692 37. Anderson RM, May RM. Prevalence of schistosome infections within molluscan populations:  
693 Observed patterns and theoretical predictions. *Parasitol.* 1979;79(1): 63-94.
- 694 38. Ismail HAA, Ahmed AEAAERM, Cha S, Jin Y. The life histories of intermediate hosts and  
695 parasites of *Schistosoma haematobium* and *Schistosoma mansoni* in the white Nile river, Sudan. *Int J*  
696 *Environ Res Public Health.* 2022;19(3): 1508.
- 697 39. Turner HC, Truscott JE, Bettis AA, Farrell SH, Deol AK, Whitton JM, et al. Evaluating the  
698 variation in the projected benefit of community-wide mass treatment for schistosomiasis: Implications  
699 for future economic evaluations. *Parasit Vectors.* 2017;10(1): 213.
- 700 40. Sow S, de Vlas SJ, Stelma F, Vereecken K, Gryseels B, Polman K. The contribution of water  
701 contact behavior to the high *Schistosoma mansoni* infection rates observed in the Senegal river basin.  
702 *BMC Infect Dis.* 2011;11(1): 198.
- 703 41. Fulford AJC, Ouma JH, Kariuki HC, Thiongo FW, Klumpp R, Kloos H, et al. Water contact  
704 observations in Kenyan communities endemic for schistosomiasis: Methodology and patterns of  
705 behaviour. *Parasitol.* 1996;113(3): 223-41.



- 706 42. de Vlas SJ, Van Oortmarssen GJ, Gryseels B, Polderman AM, Plaisier AP, Habbema JD.  
707 Schistosim: A microsimulation model for the epidemiology and control of schistosomiasis. *Am J Trop*  
708 *Med Hyg.* 1996;55(5 Suppl): 170-5.
- 709 43. Woolhouse MEJ, Hagan P. Seeking the ghost of worms past. *Nat Med.* 1999;5(11): 1225-7.
- 710 44. Gurarie D, King CH, Yoon N, Li E. Refined stratified-worm-burden models that incorporate  
711 specific biological features of human and snail hosts provide better estimates of schistosoma  
712 diagnosis, transmission, and control. *Parasit Vectors.* 2016;9(1): 428.
- 713 45. Guyatt HL, Smith T, Gryseels B, Lengeler C, Mshinda H, Siziya S, et al. Aggregation in  
714 schistosomiasis: Comparison of the relationships between prevalence and intensity in different  
715 endemic areas. *Parasitol.* 1994;109(1): 45-55.
- 716 46. R Core Team. R: A language and environment for statistical computing. Vienna, Austria: R  
717 Foundation for Statistical Computing; 2022. Available from: <https://www.R-project.org/>.
- 718 47. Fulford AJ, Butterworth AE, Ouma JH, Sturrock RF. A statistical approach to schistosome  
719 population dynamics and estimation of the life-span of schistosoma mansoni in man. *Parasitol.*  
720 1995;110 ( Pt 3)307-16.
- 721 48. Clements AC, Bosque-Oliva E, Sacko M, Landoure A, Dembele R, Traore M, et al. A  
722 comparative study of the spatial distribution of schistosomiasis in mali in 1984-1989 and 2004-2006.  
723 *PLoS Negl Trop Dis.* 2009;3(5): e431.
- 724 49. Borlase A, Prada JM, Crellen T. Modelling morbidity for neglected tropical diseases: The long  
725 and winding road from cumulative exposure to long-term pathology. *Philos Trans R Soc Lond B Biol*  
726 *Sci.* 2023;378(1887): 20220279.
- 727 50. Prada JM, Touloupou P, Adriko M, Tukahebwa EM, Lambertson PHL, Hollingsworth TD.  
728 Understanding the relationship between egg- and antigen-based diagnostics of schistosoma mansoni  
729 infection pre- and post-treatment in uganda. *Parasit Vectors.* 2018;11(1): 21.
- 730 51. European Commission. Beyond mass drug administration: Understanding schistosomiasis  
731 dynamics to stop transmission 10 April 2019 [updated 23 August 2022]. Available from:  
732 <https://cordis.europa.eu/project/id/846873>.

- 733 52. Fulford AJ, Butterworth AE, Sturrock RF, Ouma JH. On the use of age-intensity data to detect  
734 immunity to parasitic infections, with special reference to schistosoma mansoni in kenya. *Parasitol.*  
735 1992;105 ( Pt 2)219-27.
- 736 53. Quinnell RJ, Medley GF, Keymer AE. The regulation of gastrointestinal helminth populations.  
737 *Philos Trans R Soc Lond B Biol Sci.* 1990;330(1257): 191-201.
- 738 54. Hollingsworth T, Group NMCS. Insights from quantitative and mathematical modelling on the  
739 proposed who 2030 goal for schistosomiasis. *Gates Open Res.* 2019;3.
- 740 55. Toor J, Turner HC, Truscott JE, Werkman M, Phillips AE, Alsallaq R, et al. The design of  
741 schistosomiasis monitoring and evaluation programmes: The importance of collecting adult data to  
742 inform treatment strategies for schistosoma mansoni. *PLoS Negl Trop Dis.* 2018;12(10): e0006717.
- 743 56. Turner H, French M, Montresor A, King C, Rollinson D, Toor J. Economic evaluations of  
744 human schistosomiasis interventions: A systematic review and identification of associated research  
745 needs. *Wellcome Open Res.* 2020;5(45).
- 746 57. Mitchell KM, Mutapi F, Woolhouse ME. The predicted impact of immunosuppression upon  
747 population age-intensity profiles for schistosomiasis. *Parasite Immunol.* 2008;30(9): 462-70.
- 748 58. Reitzug F, Ledien J, Chami GF. Associations of water contact frequency, duration, and  
749 activities with schistosome infection risk: A systematic review and meta-analysis. *PLoS Negl Trop*  
750 *Dis.* 2023;17(6): e0011377.
- 751 59. Molehin AJ. Current understanding of immunity against schistosomiasis: Impact on vaccine  
752 and drug development. *Res Rep Trop Med.* 2020;11119-28.
- 753 60. Mitchell KM, Mutapi F, Mduluzza T, Midzi N, Savill NJ, Woolhouse ME. Predicted impact of  
754 mass drug administration on the development of protective immunity against schistosoma  
755 haematobium. *PLoS Negl Trop Dis.* 2014;8(7): e3059.
- 756 61. Mitchell KM, Mutapi F, Savill NJ, Woolhouse ME. Protective immunity to schistosoma  
757 haematobium infection is primarily an anti-fecundity response stimulated by the death of adult worms.  
758 *Proc Natl Acad Sci U S A.* 2012;109(33): 13347-52.

- 759 62. Agnew A, Fulford AJ, Mwanje MT, Gachuhi K, Gutschmann V, Krijger FW, et al. Age-  
760 dependent reduction of schistosome fecundity in schistosoma haematobium but not schistosoma  
761 mansoni infections in humans. *Am J Trop Med Hyg.* 1996;55(3): 338-43.
- 762 63. Kabatereine NB, Vennervald BJ, Ouma JH, Kemijumbi J, Butterworth AE, Dunne DW, et al.  
763 Adult resistance to schistosomiasis mansoni: Age-dependence of reinfection remains constant in  
764 communities with diverse exposure patterns. *Parasitol.* 1999;118 ( Pt 1)101-5.
- 765 64. Allan F, Dunn AM, Emery AM, Stothard JR, Johnston DA, Kane RA, et al. Use of sentinel  
766 snails for the detection of schistosoma haematobium transmission on zanzibar and observations on  
767 transmission patterns. *Acta Trop.* 2013;128(2): 234-40.
- 768 65. Tian-Bi YT, Webster B, Konan CK, Allan F, Diakité NR, Ouattara M, et al. Molecular  
769 characterization and distribution of schistosoma cercariae collected from naturally infected bulinid  
770 snails in northern and central côte d'ivoire. *Parasit Vectors.* 2019;12(1): 117.
- 771 66. Elmorshedy H, Bergquist R, Fayed A, Guirguis W, Abdel-Gawwad E, Eissa S, et al.  
772 Elimination of schistosomiasis requires multifactorial diagnostics: Evidence from high- and low-  
773 prevalence areas in the Nile delta, Egypt. *Infect Dis Poverty.* 2020;9(1): 31.
- 774 67. Diakité NR, Winkler MS, Coulibaly JT, Guindo-Coulibaly N, Utzinger J, N'Goran EK.  
775 Dynamics of freshwater snails and schistosoma infection prevalence in schoolchildren during the  
776 construction and operation of a multipurpose dam in central côte d'ivoire. *Infect Dis Poverty.*  
777 2017;6(1): 93.
- 778
