# Supplementary material for: Revisiting the impact of Schistosoma mansoni regulating mechanisms on transmission dynamics using SchiSTOP, a novel modelling framework
Source: bioRxiv or medRxiv preprint supplement (doi:10.1101/2024.02.16.24302940), 2024-02-18

# S1 Appendix

## Age-intensity profiles

**Age-intensity profiles for the complete set of modelling scenarios.** For each choice of the age-exposure function and each endemicity setting (titles), single panels refer to a fixed combination of the assumptions of worm-level regulation (columns) and snail-level regulation (rows). A single panel shows the simulated egg counts on the y-axis (mean epg is displayed, over age group and 100 stochastic realizations of the model) by age on the x-axis. The age-intensity profiles are displayed at pre-control, by varying the degree of regulating mechanism in humans (colours). Age bins are defined as to all be equally sized.

### 1. Assumption for the age-exposure function: “Model-based

### Low endemicity setting

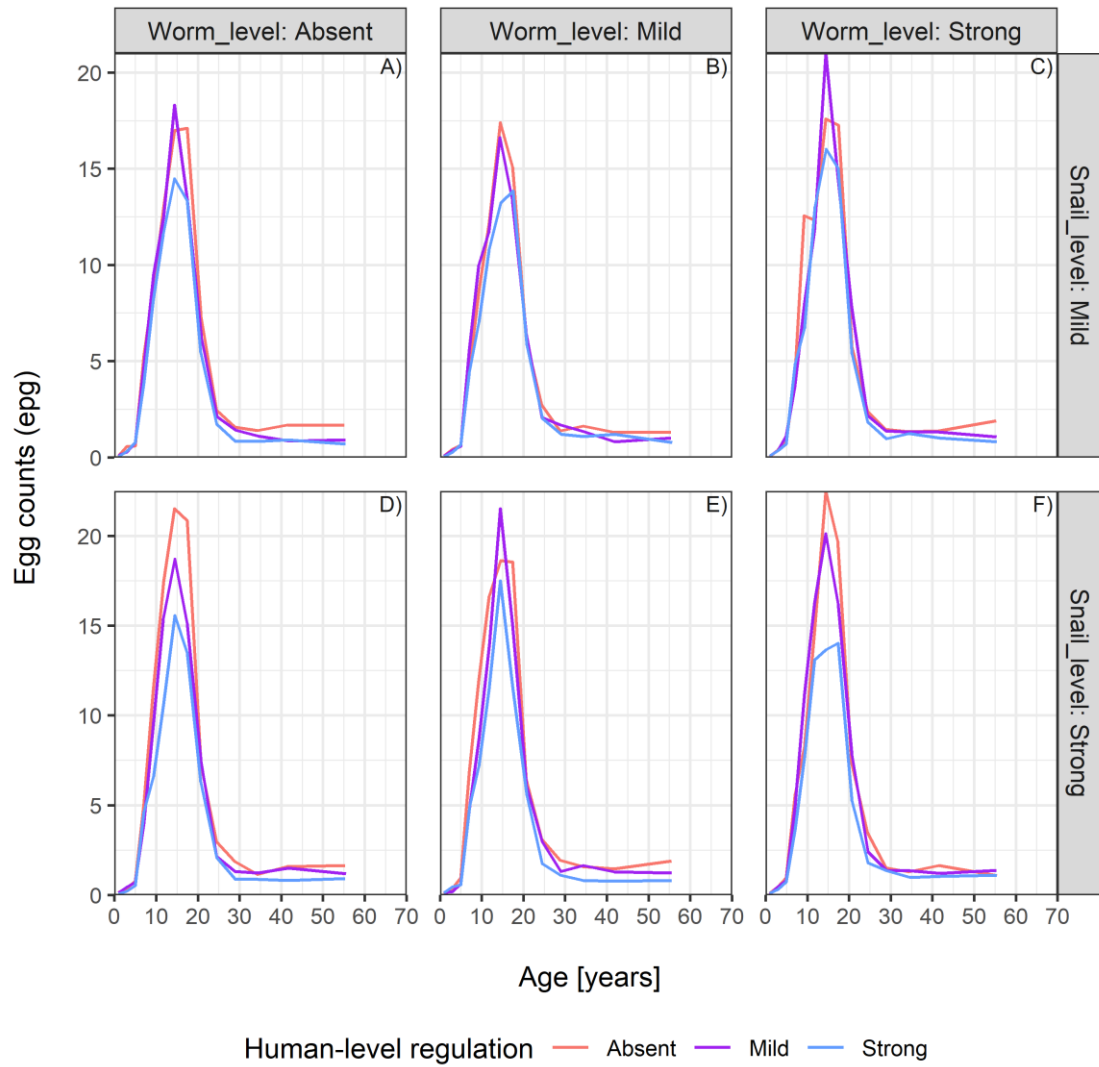

### Moderate endemicity setting

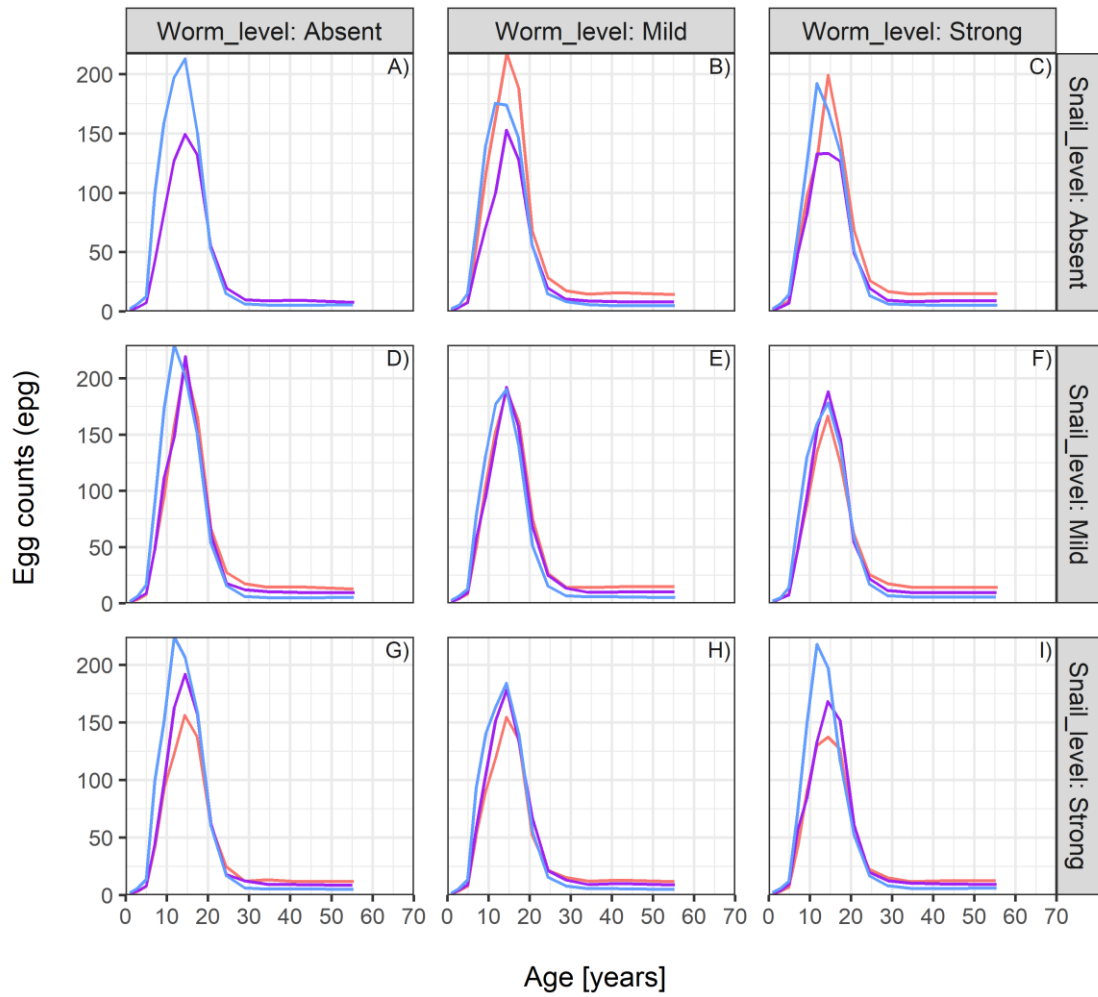

Human-level regulation — Absent — Mild — Strong

### High endemicity setting

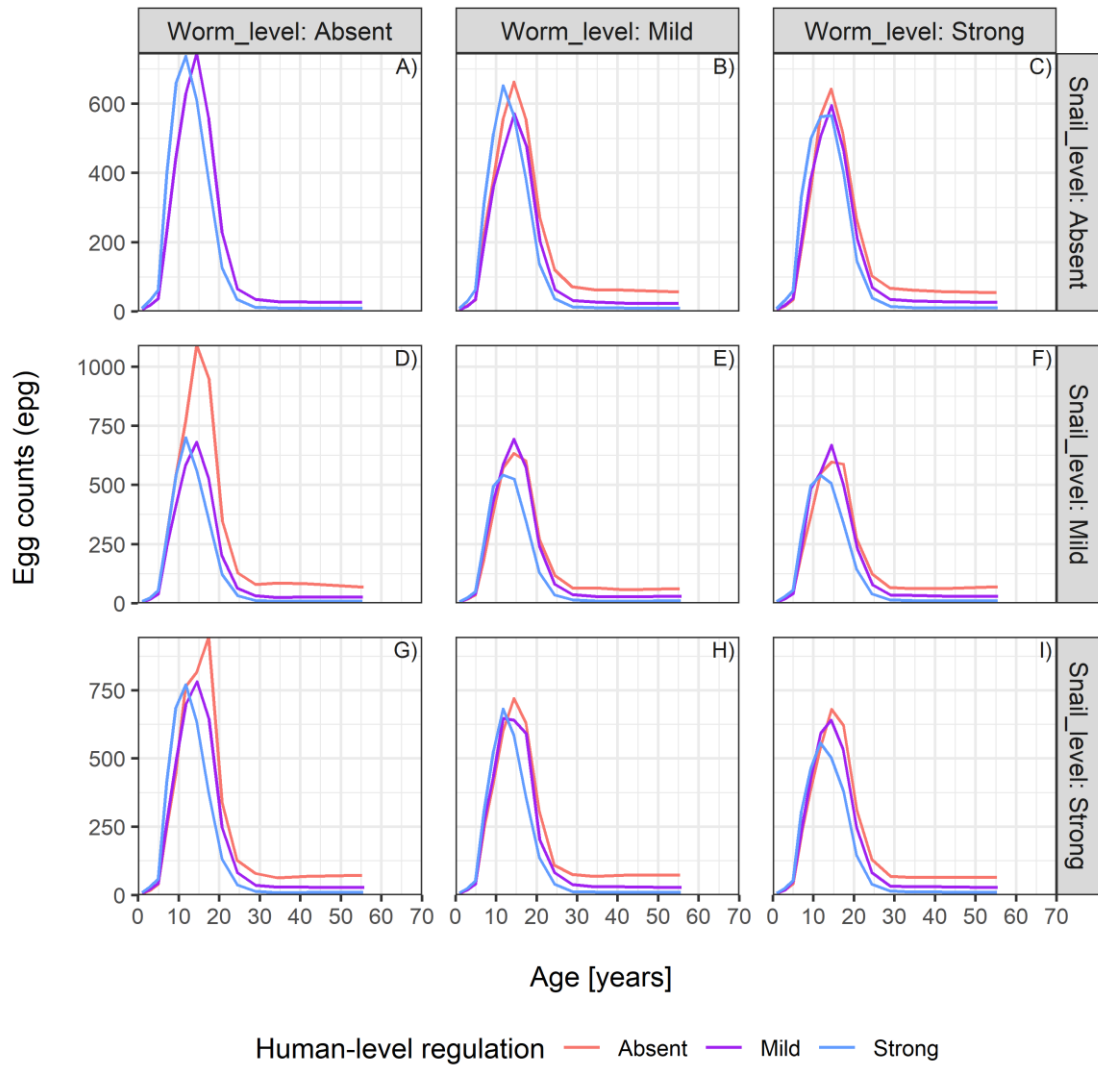

## 2. Assumption for the age-exposure function: “Based on water contacts” Low endemicity setting

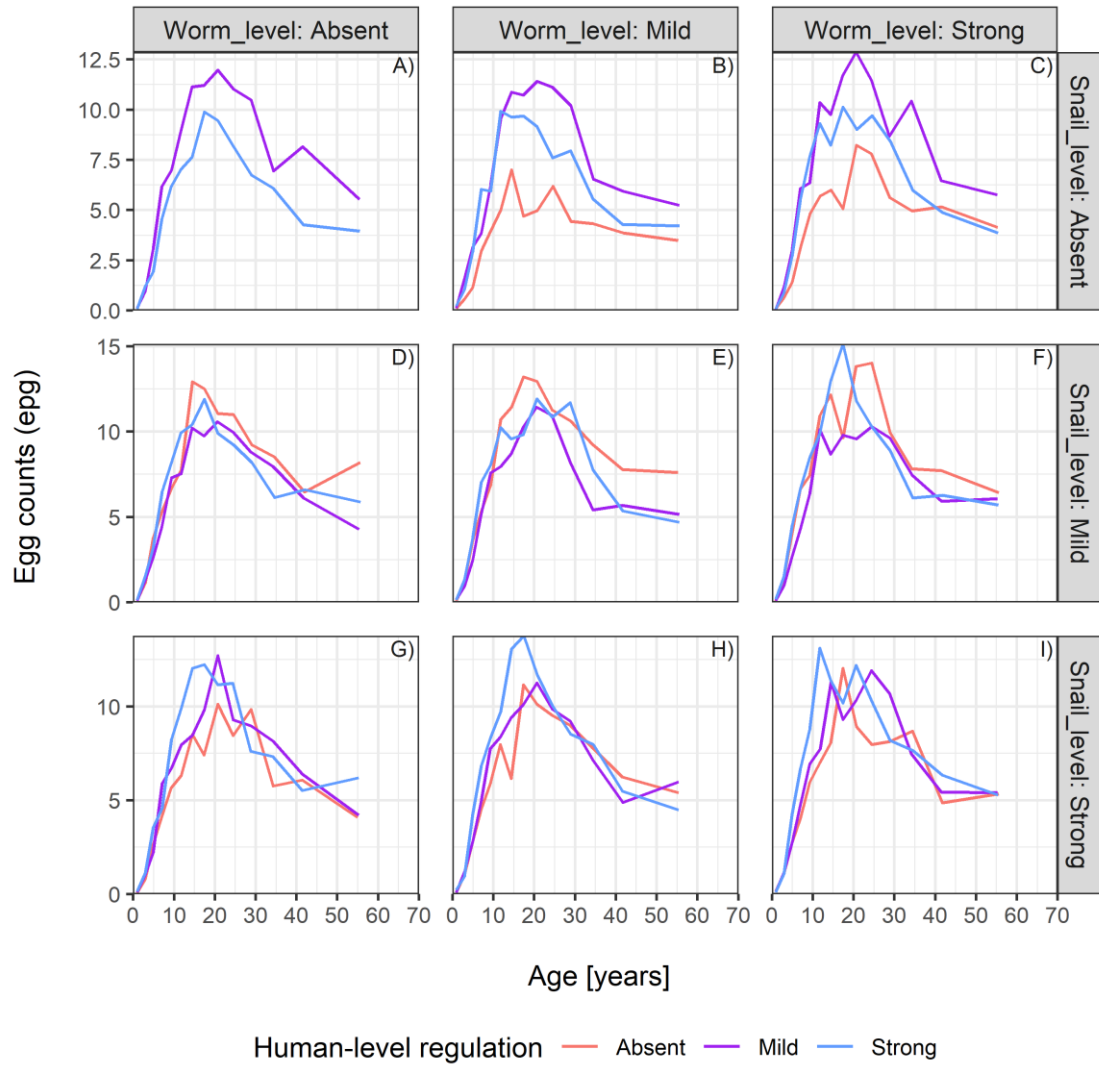

### Moderate endemicity setting

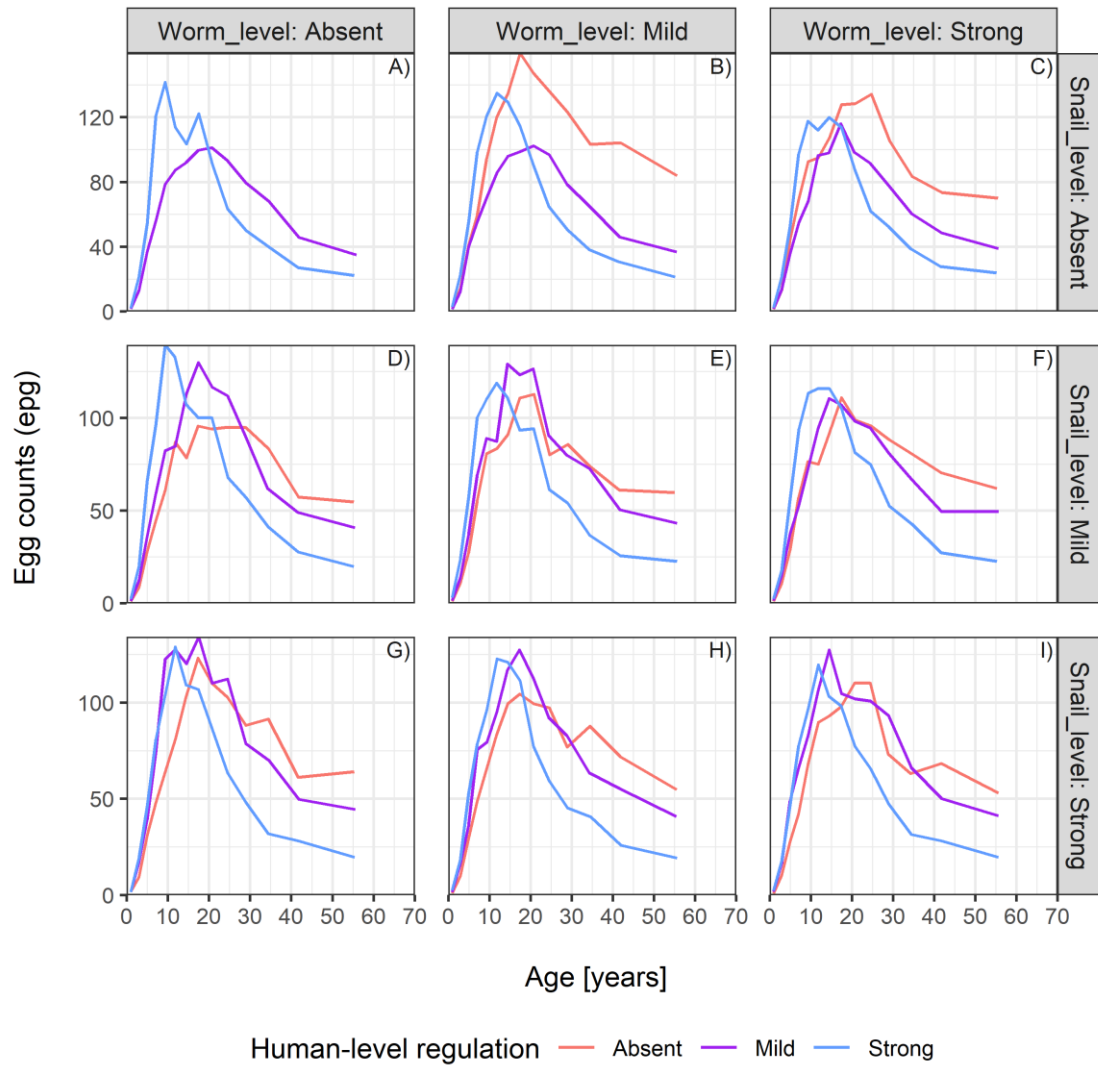

### High endemicity setting

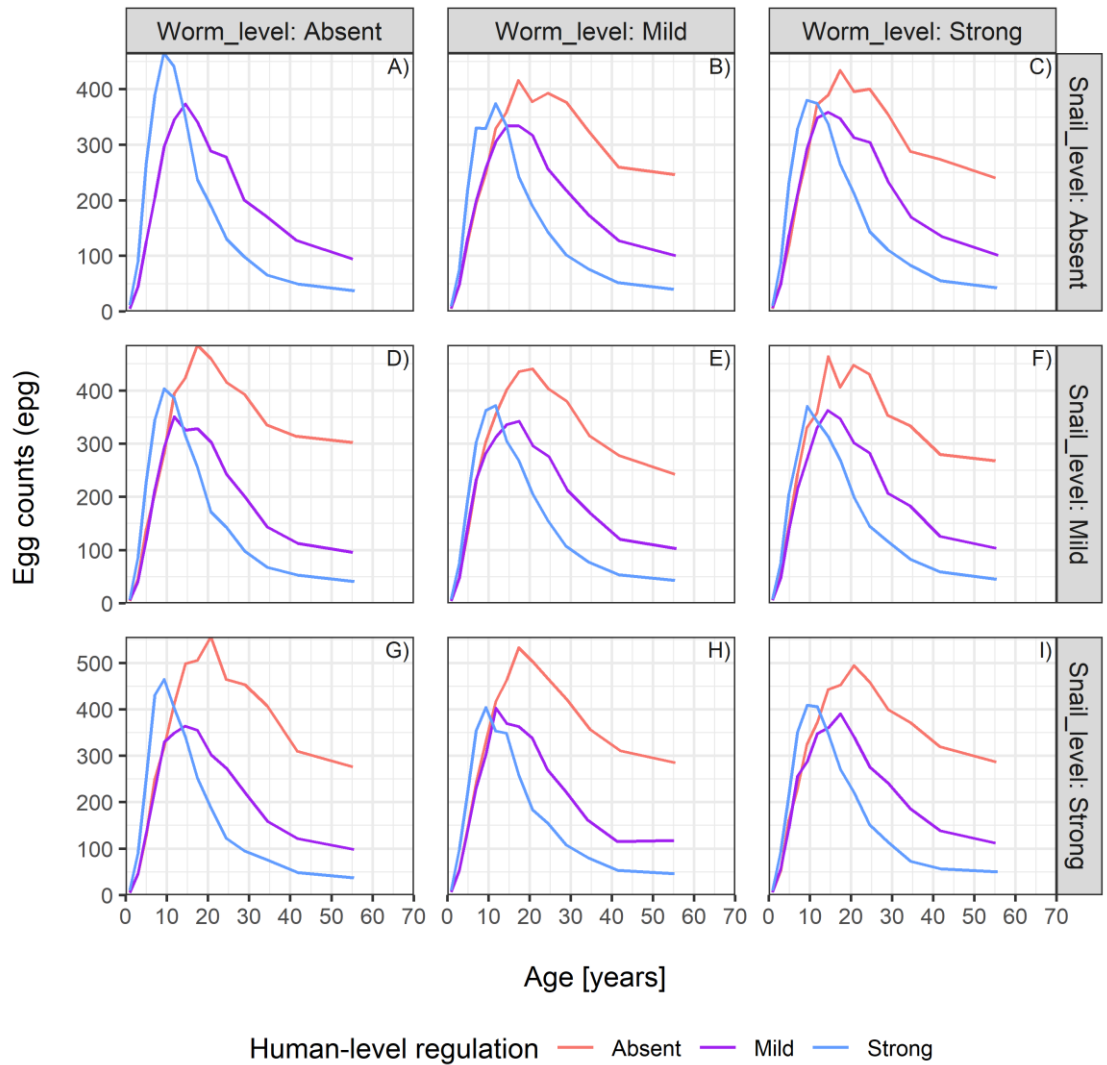

Supplement: Supplementary file [file media-1.pdf]
